# Supplementary material
Source: PubMed Central journal article supplement (PMC2841497)
Supplement: 00178.2009_1.pdf [file 00178.2009_1.pdf]

1 **Supplementary Table 1: SSLP markers within the NIDDM1 region**

| Marker   | cM Position | Base Pair Position |
|----------|-------------|--------------------|
| D1Rat291 | 102         | 200.17             |
| D1Rat218 | 102.375     | 201.13             |
| D1Mgh31  | 102.485     | 201.39             |
| D1Rat111 | 102.86      | 202.35             |
| D1Rat181 | 103.0199    | 202.76             |
| D1Arb24  | 103.26      | 202.91             |
| D1Mit27  | 103.72      | 203.3              |
| D1Mgh10  | 105.02      | 204.38             |
| D1Rat168 | 105.48      | 204.62             |
| D1Rat70  | 106.09      | 205.04             |
| D1Rat112 | 106.279     | 206.57             |
| D1Rat323 | 106.405     | 207.48             |
| D1Rat383 | 106.594     | 209.21             |
| D1Rat293 | 107         | 212.88             |
| D1Rat114 | 107.063     | 213.24             |
| D1Rat295 | 107.16      | 213.55             |
| D1Rat294 | 107.67      | 214.98             |
| D1Rat115 | 108.02      | 215.94             |
| D1Rat71  | 108.27      | 216.66             |
| D1Rat116 | 110.07      | 218.47             |
| D1Rat117 | 110.97      | 219.63             |
| D1Rat123 | 114.66      | 223.73             |
| D1Rat73  | 115.28      | 224.42             |
| D1Mit18  | 115.29      | 224.43             |
| D1Rat72  | 115.52      | 224.68             |
| D1Rat298 | 116.4       | 225.63             |
| D1Rat370 | 116.5799    | 225.86             |
| D1Rat74  | 117.55      | 227.01             |
| D1Rat223 | 118.6299    | 228.78             |
| D1Rat324 | 120.13      | 229.3              |
| D1Rat169 | 122.07      | 229.88             |
| D1Rat76  | 125.42      | 230.41             |
| D1Mit34  | 125.45      | 230.96             |
| D1Rat302 | 126.57      | 232.58             |
| D1Rat300 | 126.67      | 233.55             |
| D1Rat301 | 126.77      | 234.6              |
| D1Rat77  | 127.73      | 238.04             |
| D1Mit7   | 129.52      | 240.98             |
| D1Rat118 | 129.82      | 241.39             |
| D1Rat304 | 130.21      | 242.16             |
| D1Rat119 | 130.66      | 242.59             |
| D1Rat244 | 133.36      | 245.77             |
| D1Rat194 | 134.12      | 246.53             |
| D1Mgh12  | 134.88      | 247.32             |
| D1Rat145 | 135.33      | 247.87             |
| D1Rat235 | 135.63      | 248.1              |
| D1Rat306 | 136.2       | 248.58             |

---

|          |        |        |
|----------|--------|--------|
| D1Rat81  | 137.67 | 250.12 |
| D1Rat309 | 138.15 | 250.51 |
| D1Rat151 | 139.09 | 251.44 |
| D1Rat385 | 139.39 | 251.62 |
| D1Rat308 | 139.69 | 251.89 |
| D1Mgh13  | 139.99 | 252.34 |
| D1Rat452 | 140.1  | 252.56 |
| D1Rat156 | 140.6  | 253.41 |
| D1Rat166 | 141.35 | 255.03 |
| D1Mit8   | 142.55 | 257.36 |
| D1Rat84  | 143.75 | 259.32 |
| D1Rat225 | 144.95 | 261.18 |
| D1Rat87  | 145.25 | 261.77 |
| D1Mgh15  | 145.55 | 262.02 |
| D1Rat126 | 145.85 | 262.78 |
| D1Rat122 | 146.45 | 263.59 |
| D1Mgh14  | 146.5  | 263.7  |
| D1Rat311 | 146.51 | 263.77 |
| D1Rat195 | 147.11 | 264.57 |
| D1Rat89  | 147.5  | 265.34 |
| D1Rat312 | 147.8  | 266.03 |
| D1Rat90  | 148.15 | 267.11 |
