# Supplementary material
Source: PubMed Central journal article supplement (PMC2841497)
Supplement: 00178.2009_2.pdf [file 00178.2009_2.pdf]

1 **Supplementary Table 2: Genes within the 2.4 Mb QTL for Glucose Tolerance on**  
2 **Rat Chromosome 1**

| <u>Gene Name</u>  |
|-------------------|
| <i>Tmem16a</i>    |
| <i>fgf3</i>       |
| <i>fgf4</i>       |
| <i>fgf15</i>      |
| <i>oraov1</i>     |
| <i>ccnd1</i>      |
| <i>rmt1</i>       |
| <i>tpcn2</i>      |
| <i>mrgprf</i>     |
| <i>mrgprd</i>     |
| <i>ighmbp2</i>    |
| <i>mrpl21</i>     |
| <i>cpt1a</i>      |
| <i>mtl5</i>       |
| <i>gal</i>        |
| <i>lrp5</i>       |
| <i>RGD1311946</i> |
| <i>Fam18b2</i>    |
| <i>Suv420h1</i>   |
| <i>Chka</i>       |
| <i>Tcirg1</i>     |
| <i>Ndufs8</i>     |
| <i>Aldh3b1</i>    |
| <i>Unc93b1</i>    |
| <i>acy3</i>       |
| <i>Doc2g</i>      |
| <i>Ndufv1</i>     |
| <i>gstp1</i>      |
| <i>gstp2</i>      |
| <i>RGD1307603</i> |
| <i>Cdk2ap2</i>    |
| <i>Pitpnm1</i>    |
| <i>Aip</i>        |
| <i>Tmem134</i>    |
| <i>Cabp4</i>      |
| <i>Coro1b</i>     |
| <i>loc499300</i>  |
| <i>Ptprcap</i>    |
| <i>Rps6kb2</i>    |
| <i>Tbc1d10c</i>   |
| <i>ppp1ca</i>     |
| <i>clc</i>        |
| <i>clcf1</i>      |

---

*Pold4*  
*Ssh3*  
*Ankrd13d*  
*Adrbk1*  
*Fbxl11*  
*Rhod*  
*Syt12*  
*LOC689065*  
*Pc*  
*LOC688721*  
*Rce1*  
*Sptbn2*  
*Spnb3*  
*LOC474154*  
*Rbm4b*  
*Ccs*  
*Ccdc87*  
*Ctsf*  
*Actn3*

---
